# Supplementary material for: Better responses by combination of left bundle branch area pacing and cardiac resynchronization therapy in heart failure patients
Source: Research Square preprint supplement (doi:10.21203/rs.3.rs-8183133/v1), 2025-12-13
Supplement: Supplementary file 1 [file a04a9324b78e09b686471b5b.docx]

| Parameters | Baseline | 3-Day | 6-Month | Change★ | P value | | |
| --- | --- | --- | --- | --- | --- | --- | --- |
| 3-day vs. Baseline | 6-month vs. Baseline | 3-day vs.  6-month |
| QRSd (ms) | 166.9±27.3 | 127.6±26.7△ | 130.2±25.3△ | 36.8±20.7△ | <0.001 | <0.001 | 0.515 |
| IVMD (ms) | 43.9±17.0 | 23.9±10.3 | 13.9±10.9 | 30.0±18.9 | <0.001 | <0.001 | <0.001 |
| PSD (ms) | 171.1±57.7 | 139.9±43.4 | 86.8±42.1 | 84.3±47.2△ | 0.001 | <0.001 | <0.001 |

**Supplementary table 1. Electrical and mechanical synchrony in patients without AF and receiving LOT-CRT (N=17)**

△P<0.05 vs. BiV-CRT group; ★Change refers to change of parameters from baseline to 6 months after implantation.

IMVD, interventricular mechanical delay; PSD, peak strain dispersion; and QRSd, QRS duration.

**Supplementary table 2. LV reverse remodeling and improvement of systolic function in patients without AF and receiving LOT-CRT (N=17)**

| **Parameters** | **Baseline** | **3 Days** | **6 Months** | ***P* value** | | |
| --- | --- | --- | --- | --- | --- | --- |
| **3-day vs. Baseline** | **6-month vs. Baseline** | **3-day vs.**  **6-month** |
| LVEDD (mm) | 65.7±9.4 | 64.5±9.4 | 57.2±11.6 | 0.423 | <0.001 | <0.001 |
| LVEDV (mL) | 228.1±78.6 | 209.9 ± 75.9 | 171.4±83.6 | <0.001 | <0.001 | <0.001 |
| LVESV (mL) | 159.9±65.2 | 135.8±57.7 | 94.5±66.5 | <0.001 | <0.001 | <0.001 |
| LVEF (%) | 31.0±4.0 | 33.0±5.2 | 49.5±12.6 | <0.001 | <0.001 | <0.001 |
| GLS (%) | -6.9±2.0 | -7.9±3.0 | -11.5±3.2 | 0.001 | <0.001 | <0.001 |
| GWI (mmHg%) | 518.1±187.8 | 617.1±274.0 | 841.7±295.8 | <0.001 | <0.001 | <0.001 |
| GCW (mmHg%) | 920.1±283.2 | 996.6±286.9 | 1195.6±355.5 | <0.001 | <0.001 | 0.003 |
| GWW (mmHg%) | 424.6±142.9 | 355.0±109.8 | 259.4±101.2 | 0.017 | <0.001 | 0.002 |
| GWE (%) | 65.2±10.5 | 66.8±9.5 | 86.9±7.3△ | 0.103 | <0.001 | <0.001 |

△P<0.05 vs. BiV-CRT group.

GCW, global constructive work; GLS, global longitudinal strain; GWE, global work efficiency; GWI, global work index; GWW global wasted work; LVEDD, left ventricular end-diastolic diameter; LVEDV, left ventricular end-diastolic volume; LVEF, left ventricular ejection fraction; and LVESV, left ventricular end-systolic volume.
